# Supplementary material
Source: HighWire-hosted journal article supplement (https://le.uwpress.org/highwire/filestream/3118/field_highwire_adjunct_files/1/LE-99-2-Isenhardt-appB.pdf)
Supplement: LE-99-2-Isenhardt-appB.pdf [file LE-99-2-Isenhardt-appB.pdf]

## Appendix B: Parameter estimates for year and county dummy variables

**Table B1:** Parameter estimates for year and county dummy variables

|                        | (3a)       |         | (3b)             |         | (5a)      |         | (5b)       |         | (5c)       |         |
|------------------------|------------|---------|------------------|---------|-----------|---------|------------|---------|------------|---------|
|                        | $\ln(n-1)$ |         | $\ln(n^{nRH}-1)$ |         | $\log(p)$ |         | $\log(p)$  |         | $\log(p)$  |         |
| <i>Year</i>            |            |         |                  |         |           |         |            |         |            |         |
| 2008                   | 0.092      | (0.092) | 0.128            | (0.110) | 0.220***  | (0.037) | 0.208 ***  | (0.037) | 0.209 ***  | (0.036) |
| 2009                   | 0.266***   | (0.080) | 0.299***         | (0.098) | 0.312***  | (0.033) | 0.304 ***  | (0.033) | 0.318 ***  | (0.031) |
| 2010                   | 0.168*     | (0.086) | 0.218**          | (0.104) | 0.435***  | (0.036) | 0.427 ***  | (0.036) | 0.436 ***  | (0.034) |
| 2011                   | 0.214**    | (0.087) | 0.237**          | (0.102) | 0.575***  | (0.035) | 0.577 ***  | (0.035) | 0.574 ***  | (0.034) |
| 2012                   | 0.230***   | (0.076) | 0.287***         | (0.093) | 0.701***  | (0.037) | 0.695 ***  | (0.037) | 0.701 ***  | (0.035) |
| 2013                   | 0.575***   | (0.099) | 0.611***         | (0.109) | 0.875***  | (0.040) | 0.896 ***  | (0.041) | 0.882 ***  | (0.039) |
| 2014                   | 0.220***   | (0.082) | 0.261***         | (0.098) | 1.024***  | (0.032) | 1.024 ***  | (0.032) | 1.020 ***  | (0.031) |
| 2015                   | 0.084      | (0.084) | 0.111            | (0.100) | 1.092***  | (0.032) | 1.096 ***  | (0.032) | 1.100 ***  | (0.030) |
| 2016                   | -0.121     | (0.089) | -0.128           | (0.107) | 1.085***  | (0.035) | 1.084 ***  | (0.036) | 1.068 ***  | (0.034) |
| 2017                   | -0.154*    | (0.085) | -0.165           | (0.103) | 1.129***  | (0.033) | 1.128 ***  | (0.034) | 1.136 ***  | (0.032) |
| 2018                   | -0.268***  | (0.099) | -0.261**         | (0.114) | 1.126***  | (0.042) | 1.120 ***  | (0.043) | 1.135 ***  | (0.038) |
| <i>County</i>          |            |         |                  |         |           |         |            |         |            |         |
| Altmarkkreis Salzwedel | 0.432***   | (0.123) | 0.583***         | (0.143) | -0.065    | (0.057) | -0.059     | (0.057) | -0.090     | (0.057) |
| Börde                  | 0.407***   | (0.064) | 0.512***         | (0.073) | 0.256***  | (0.028) | 0.250 ***  | (0.027) | 0.242 ***  | (0.027) |
| Burgenlandkreis        | 0.336***   | (0.116) | 0.432***         | (0.132) | 0.177***  | (0.042) | 0.183 ***  | (0.042) | 0.152 ***  | (0.043) |
| Dessau-Roßlau          | 0.046      | (0.096) | -0.111           | (0.174) | -0.066    | (0.079) | -0.076     | (0.076) | -0.059     | (0.078) |
| Halle (Saale)          | -0.187     | (0.133) | -0.104           | (0.148) | 0.009     | (0.270) | -0.024     | (0.261) | -0.006     | (0.272) |
| Harz                   | 0.498***   | (0.067) | 0.620***         | (0.078) | 0.233***  | (0.031) | 0.220 ***  | (0.031) | 0.210 ***  | (0.030) |
| Jerichower Land        | 0.569***   | (0.070) | 0.684***         | (0.085) | -0.096**  | (0.039) | -0.101 *** | (0.039) | -0.094 **  | (0.038) |
| Magdeburg              | 0.218      | (0.165) | 0.140            | (0.219) | 0.088     | (0.150) | 0.101      | (0.148) | 0.087      | (0.135) |
| Mansfeld-Südharz       | 0.225***   | (0.076) | 0.267***         | (0.094) | 0.020     | (0.032) | 0.021      | (0.032) | 0.016      | (0.031) |
| Saalekreis             | 0.386***   | (0.072) | 0.449***         | (0.081) | 0.095***  | (0.033) | 0.096 ***  | (0.032) | 0.093 ***  | (0.033) |
| Salzlandkreis          | 0.152***   | (0.058) | 0.240***         | (0.069) | 0.091***  | (0.026) | 0.084 ***  | (0.026) | 0.066 **   | (0.026) |
| Stendal                | 0.211*     | (0.127) | 0.255            | (0.156) | -0.011    | (0.066) | -0.026     | (0.064) | -0.007     | (0.060) |
| Wittenberg             | 0.106      | (0.101) | 0.060            | (0.146) | -0.236*** | (0.045) | -0.230 *** | (0.045) | -0.224 *** | (0.041) |
| Greiz                  | -0.919***  | (0.070) | -0.785***        | (0.081) | 0.220***  | (0.036) | 0.222 ***  | (0.043) | 0.173 ***  | (0.036) |
| Kyffhäuserkreis        | 0.583***   | (0.137) | 0.672***         | (0.140) | 0.044     | (0.054) | 0.060      | (0.053) | 0.038      | (0.055) |
| Nordhausen             | 0.463*     | (0.257) | 0.569**          | (0.248) | 0.266***  | (0.092) | 0.260 ***  | (0.091) | 0.248 ***  | (0.090) |
| Saale Holzland Kreis   | -0.025     | (0.115) | 0.107            | (0.127) | 0.140     | (0.146) | 0.109      | (0.153) | 0.122      | (0.143) |
| Sömmerda               | 0.086      | (0.223) | 0.167            | (0.218) | 0.042     | (0.098) | 0.032      | (0.087) | 0.028      | (0.097) |
| Weimarer Land          | 0.747      | (0.670) | 0.966            | (0.699) | 0.424***  | (0.086) | 0.421 ***  | (0.113) | 0.408 ***  | (0.096) |
| Leipzig                | 0.300      | (0.258) | 0.409            | (0.253) | -0.049    | (0.046) | -0.043     | (0.050) | -0.061     | (0.043) |
| Nordsachsen            | 0.331***   | (0.125) | 0.451***         | (0.138) | 0.193**   | (0.079) | 0.182 **   | (0.077) | 0.183 **   | (0.077) |
| Elbe-Elster            | 0.400***   | (0.121) | 0.555***         | (0.137) | -0.038    | (0.093) | -0.079     | (0.093) | -0.057     | (0.089) |
| Havelland              | 0.637***   | (0.168) | 0.792***         | (0.175) | -0.034    | (0.077) | -0.042     | (0.076) | -0.042     | (0.074) |
| Ostprignitz-Ruppin     | 0.079      | (0.266) | 0.273            | (0.268) | 0.194*    | (0.105) | 0.183 *    | (0.105) | 0.164      | (0.104) |
| Potsdam-Mittelmark     | 0.405**    | (0.197) | 0.573***         | (0.198) | -0.200*** | (0.070) | -0.218 *** | (0.071) | -0.222 *** | (0.069) |
| Prignitz               | 0.711***   | (0.219) | 0.890***         | (0.215) | 0.093     | (0.113) | 0.079      | (0.101) | 0.072      | (0.109) |
| Teltow-Fläming         | 0.085      | (0.333) | 0.282            | (0.355) | 0.137     | (0.124) | 0.113      | (0.136) | 0.106      | (0.120) |

Note: Heteroscedasticity-consistent standard errors in parentheses (White 1980). Asterisks indicate \*p < 0.1; \*\*p < 0.05; \*\*\*p < 0.01.
